# Supplementary material for: CS12192, a Novel JAK3/JAK1/TBK1 Inhibitor, Synergistically Enhances the Anti-Inflammation Effect of Methotrexate in a Rat Model of Rheumatoid Arthritis
Source: MDPI journal article supplement (doi:10.3390/ijms232113394), 2022-11-02
Supplement: s1 [file s1]

# CS12192, a novel JAK3/JAK1/TBK1 inhibitor, synergistically enhances the anti-inflammation effect of methotrexate on a rat model of rheumatoid arthritis

Zhengyu Fang <sup>1,2,#</sup>, Yiping Hu <sup>1,#</sup>, Jiajing Dai <sup>3</sup>, Lianhua He <sup>1</sup>, Juan He <sup>1</sup>, Bihua Xu <sup>1</sup>, Xinle Han <sup>3</sup>, Fubo Zhong <sup>2,3</sup>, Hui-Yao Lan <sup>4,\*</sup> and Qingwen Wang <sup>1,\*</sup>

<sup>1</sup> Department of Rheumatism and Immunology, Peking University Shenzhen Hospital. Shenzhen key Laboratory of Inflammatory and Immunology Diseases, Shenzhen, Guangdong Province, China

<sup>2</sup> Department of Pathology, Peking University Shenzhen Hospital, Guangdong Province, China

<sup>3</sup> Clinical Research Institute, Shenzhen Peking University - The Hong Kong University of Science and Technology Medical Center, Guangdong Province, China.

<sup>4</sup> Department of Medicine and Therapeutics, Li Ka Shing Institute of Health Sciences, and Lui Che Woo Institute of Innovative Medicine, The Chinese University of Hong Kong, Hong Kong, China.

\* Correspondence: Qingwen Wang, wangqingwen@pkuszh.com; Hui-Yao Lan, hylan@cuhk.edu.hk

# These authors contributed equally to this work

## Supplementary Figure Legends
